# Supplementary material for: Low complexity and disordered regions of proteins have different structural and amino acid preferences
Source: Royal Society of Chemistry journal article supplement (doi:10.1039/c4mb00425f), 2014-11-21
Supplement: c4mb00425f4.pdf [file c4mb00425f4.pdf]

### Supporting Information Legends

**Fig. S1.** Amino acid composition of SwissProt, ATOM\_LCRbase, X-RAY\_ATOM\_LCRbase, NMR\_ATOM\_LCRbase and SEQRES\_LCRbase.

**Fig. S2.** Length-wise population of LCRs in ATOM\_LCRbase and SEQRES\_LCRbase.
