# Supplementary figures and images for: Low complexity and disordered regions of proteins have different structural and amino acid preferences
Source: Royal Society of Chemistry journal article supplement (doi:10.1039/c4mb00425f), 2014-11-21

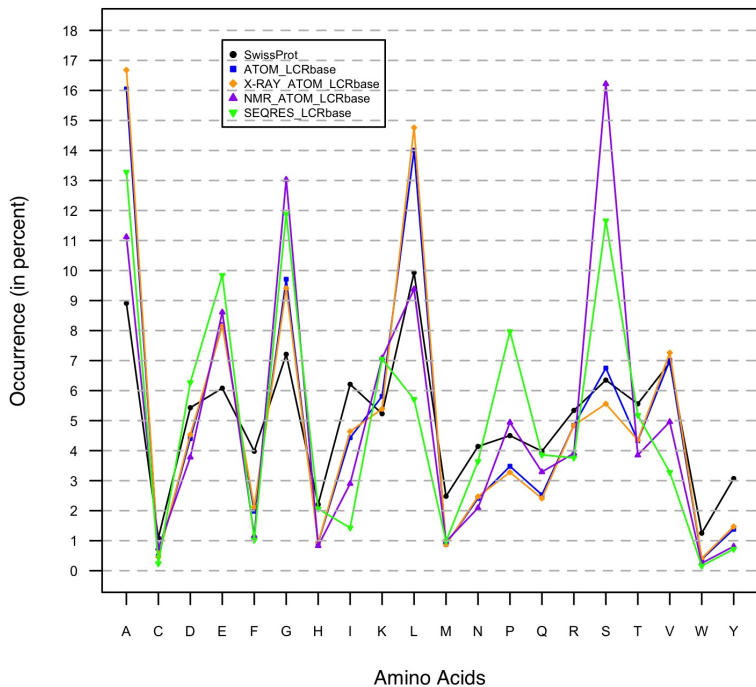

Supplement: c4mb00425f2.pdf [file c4mb00425f2.pdf]

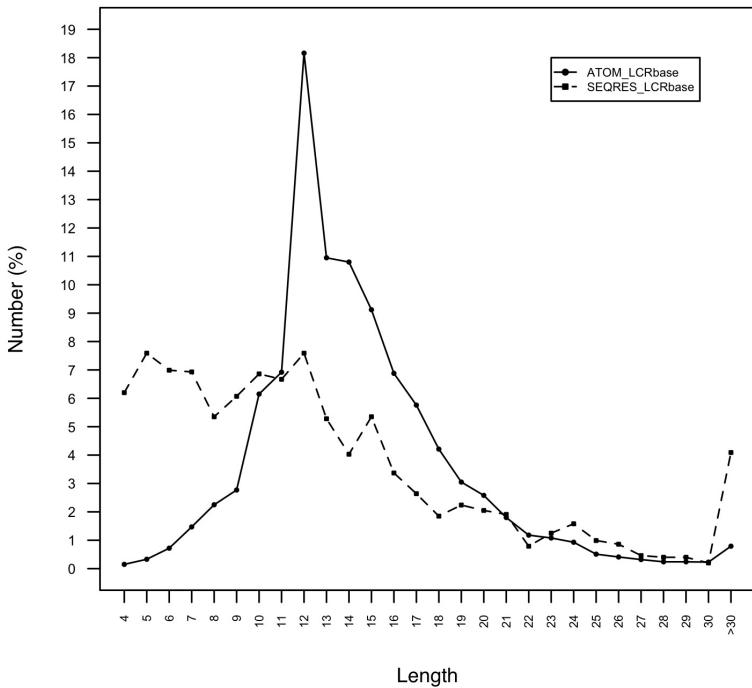

Supplement: c4mb00425f3.pdf [file c4mb00425f3.pdf]
